# Supplementary material
Source: PubMed Central journal article supplement (PMC3431689)
Supplement: supp_M112.374694_jbc.M112.374694-1.pdf [file supp_M112.374694_jbc.M112.374694-1.pdf]

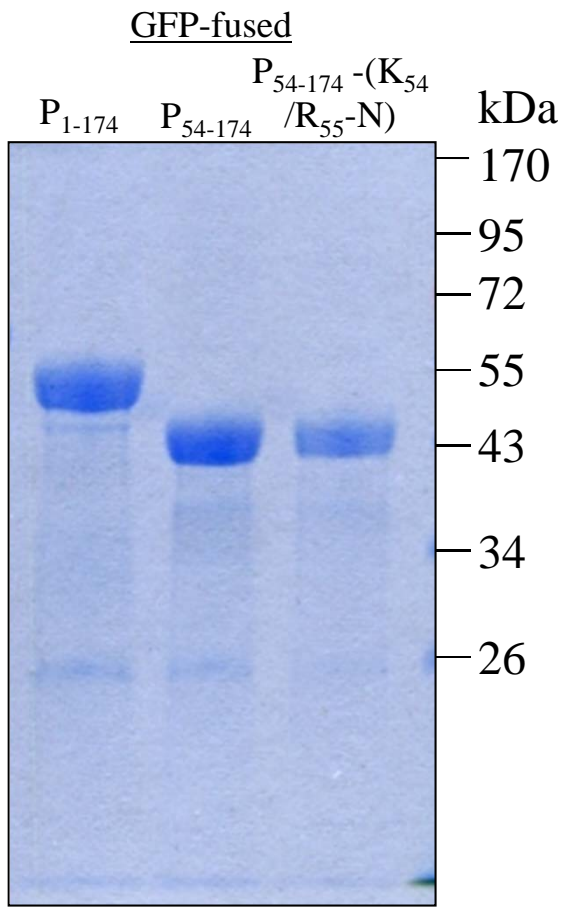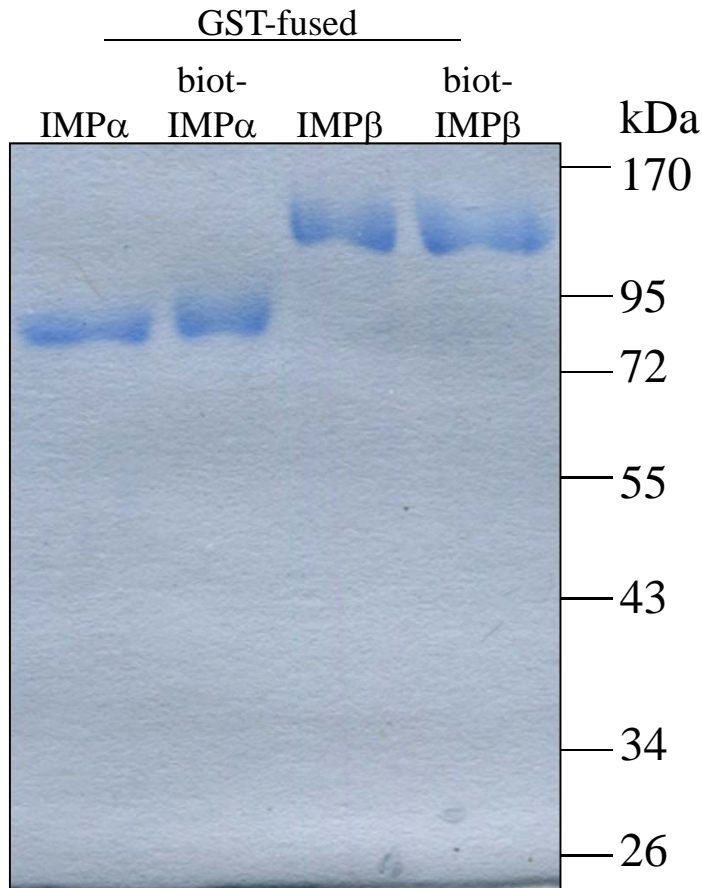

**Fig S1**

**Figure S1.** Coomassie stained SDS-polyacrylamide gel of purified recombinant proteins: GFP-fused P<sub>1-174</sub>, P<sub>54-174</sub> and P<sub>54-174</sub>-(K<sub>54</sub>/R<sub>55</sub>-N) (above) and GST-fused IMP $\alpha$  and IMP $\beta$ 1 with or without biotinylation (biot) (below) as described in Materials and Methods. Proteins were separated on a 12% SDS-PAGE gel prior to staining.
